# Supplementary material
Source: PubMed Central journal article supplement (PMC7176553)

Fig. S1

A

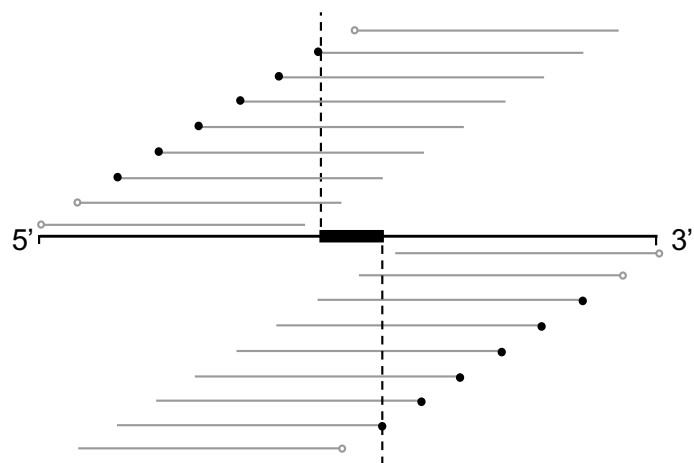

B

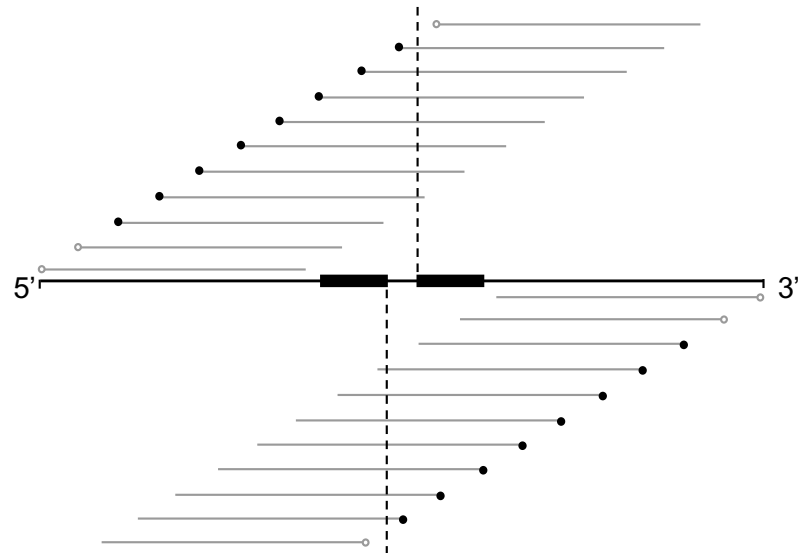

C

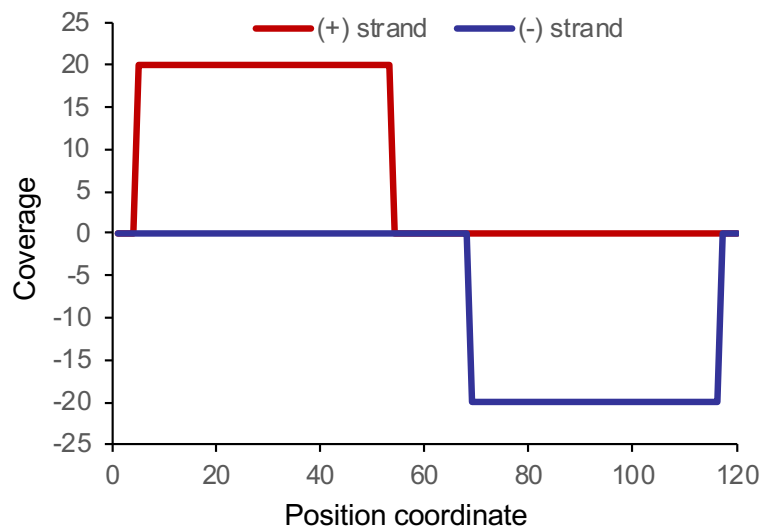

D

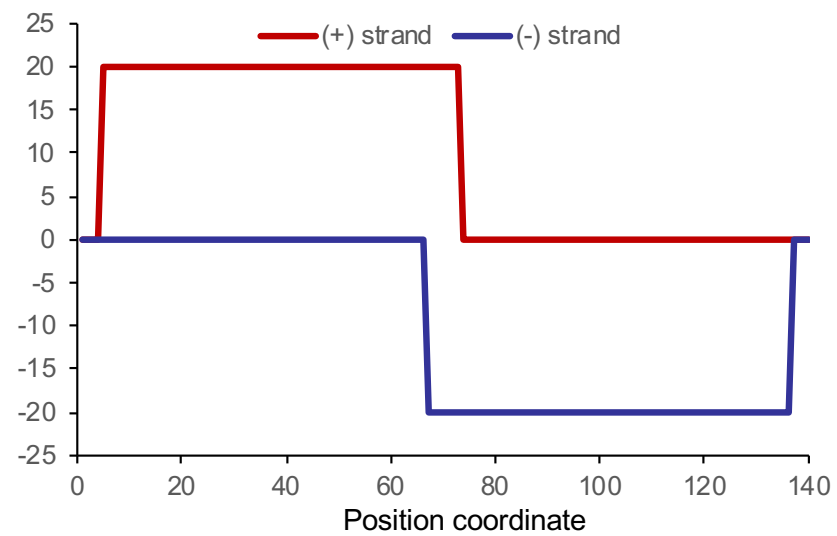

Fig. S2

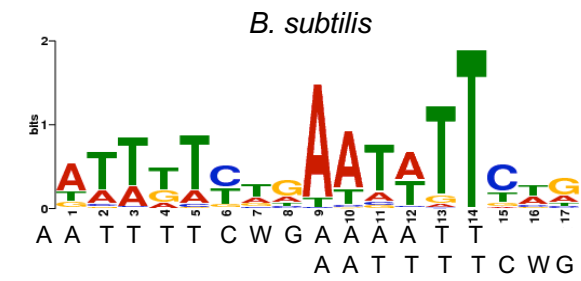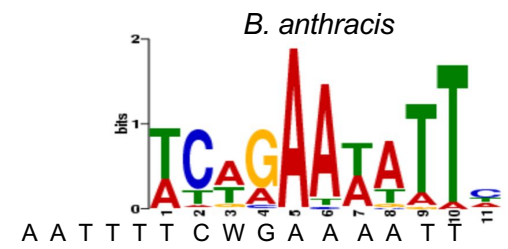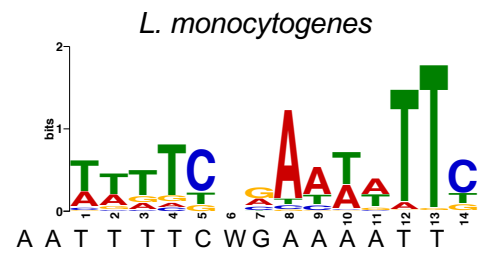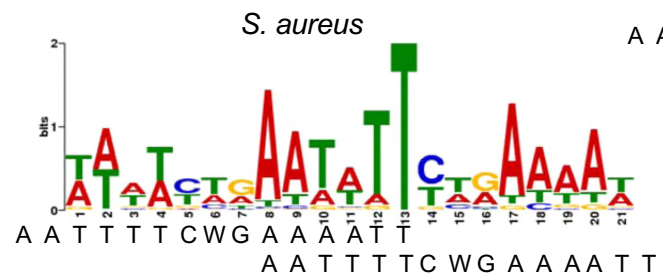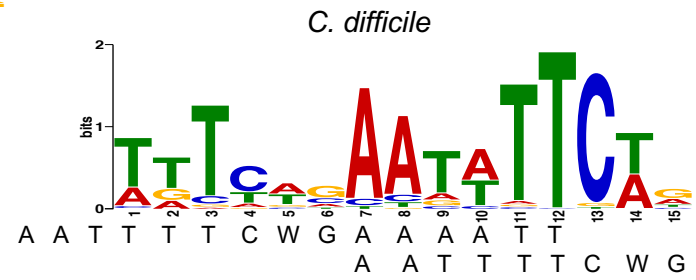

Fig. S3

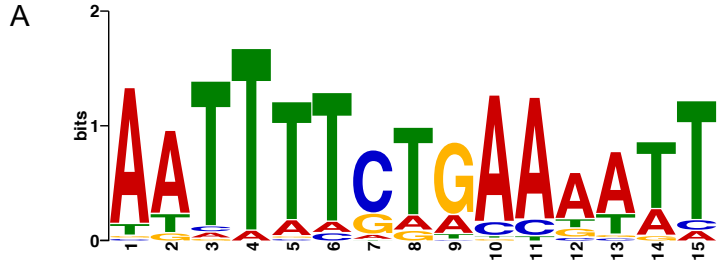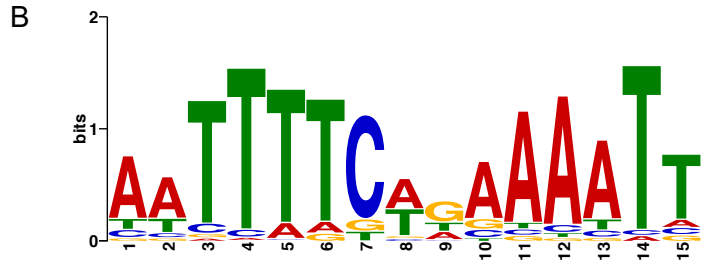

Fig. S4

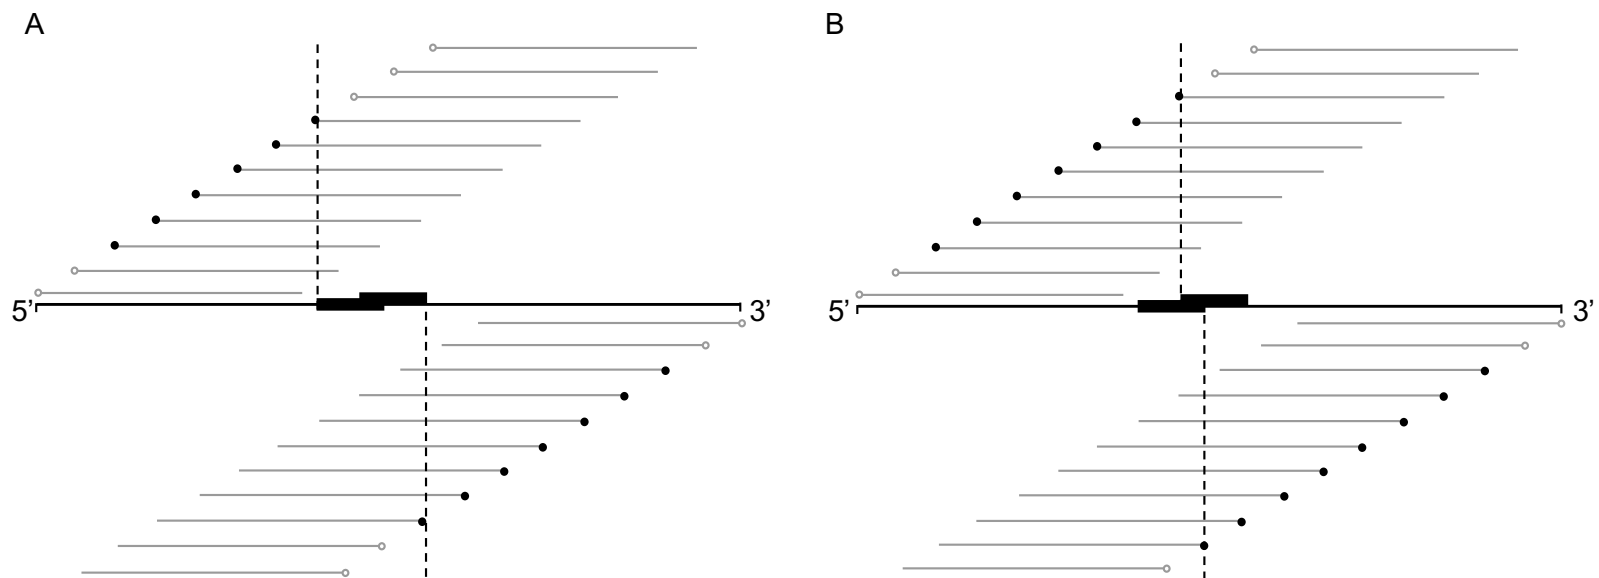

Fig. S5

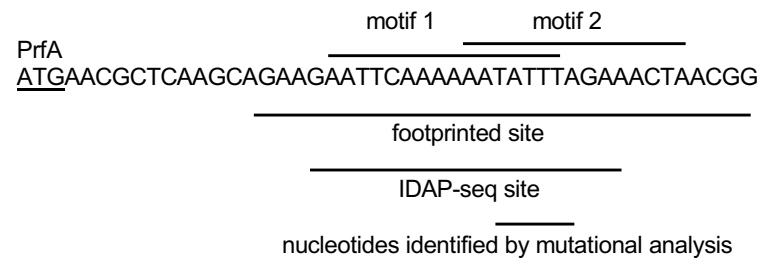

Supplement: NIHMS1069281-supplement-Supp_figs_S1-5.pdf [file NIHMS1069281-supplement-Supp_figs_S1-5.pdf]
